# Supplementary material for: Zinc Oxide Nanoparticles Alleviate Chilling Stress in Rice (Oryza Sativa L.) by Regulating Antioxidative System and Chilling Response Transcription Factors
Source: PubMed Central journal article supplement (PMC8069548; doi:10.3390/molecules26082196), 2021-04-11
Supplement: molecules-26-02196-s001.pdf [file molecules-26-02196-s001.pdf]

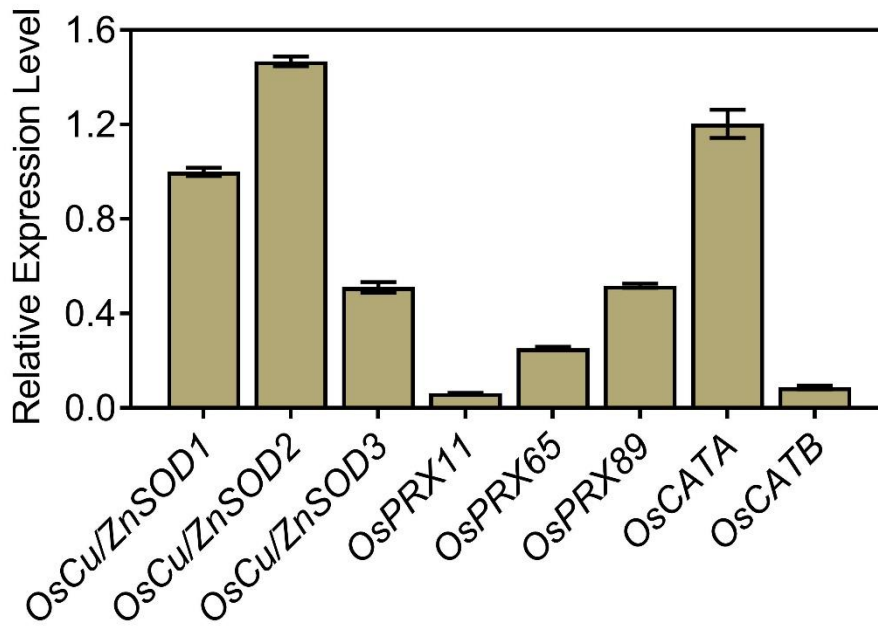

**Figure S1. Expression profiles of antioxidant enzymes genes in rice leaves.** The expression levels were first normalized to the rice internal control gene *UBQ5* and reported relative to *OsCu/ZnSOD1* expression level of control (assigned a value of 1). All analyses were performed with three replicates.

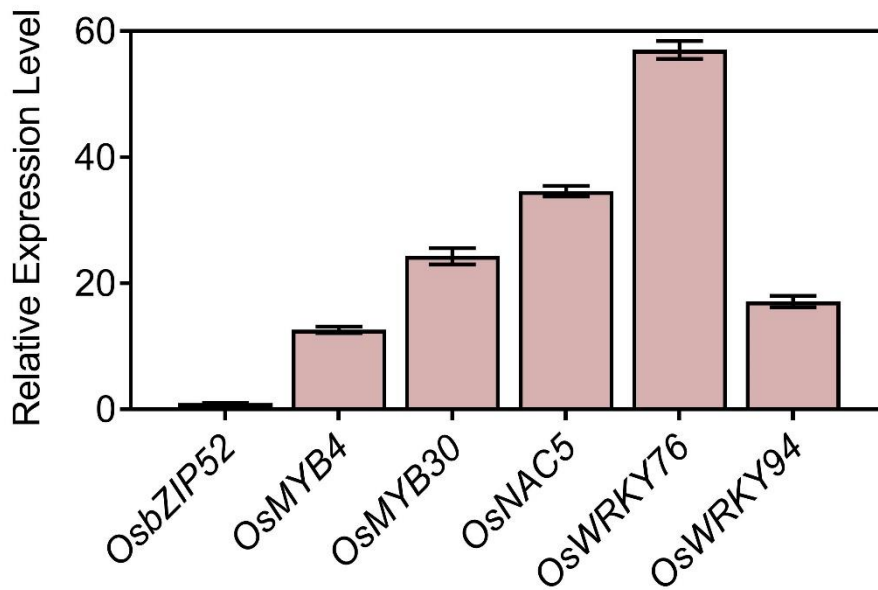

**Figure S2. Expression profiles of chilling response transcription factors genes in rice leaves.** The expression levels were first normalized to the rice internal control gene *UBQ5* and reported relative to *OsCu/ZnSOD1* expression level of control (assigned a value of 1). All analyses were performed with three replicates.

**Table S1. Characterization details of ZnO NPs.**

| NPs | Size<br>nm | Zeta potential<br>mV | Mobility<br>$\mu\text{mcm/Vs}$ | Conductivity<br>mS/cm |
|-----|------------|----------------------|--------------------------------|-----------------------|
| ZnO | 30         | 6.697                | 0.525                          | 0.010                 |

**Table S2. Primers used in the present study.**

| Gene Name          | LOC No.             | Forwad Primer Sequence (5'→3') | Reverse Primer Sequence (5'→3') |
|--------------------|---------------------|--------------------------------|---------------------------------|
| <i>UBQ5</i>        | <i>Os06g0650100</i> | CCGACTACAACATCCAGAAGGAG        | AACAGGAGCCTACGCCTAAGC           |
| <i>OsCu/ZnSOD1</i> | <i>Os03g0351500</i> | ATCCTGATGATCTTGAAAGGG          | AAAACACATAGTTCATTGGGCG          |
| <i>OsCu/ZnSOD2</i> | <i>Os07g0665200</i> | CTTAGCAAGACCACTGGAAATG         | TGTTGGAAAGTTGAGACGTCTA          |
| <i>OsCu/ZnSOD3</i> | <i>Os08g0561700</i> | CACCCTTTTGTGTCATCTTCGAG        | TTACTGTGAGACGAACGATCAA          |
| <i>OsPRX11</i>     | <i>Os01g0294700</i> | TACCGCGACCTCCTCAACTA           | GAAGCCCGGCATGAACCT              |
| <i>OsPRX65</i>     | <i>Os05g0134400</i> | CTCCCGGACTCCACCTTCA            | GGAGCAGTGGCCGACG                |
| <i>OsPRX89</i>     | <i>Os06g0681600</i> | TTCCACGACTGCTTCGTCAG           | TCTCGACCACGCTCTTGATG            |
| <i>OsCATA</i>      | <i>Os02g0115700</i> | TCCAGTGTGATGAGTCGTTGG          | TCTTCACATGCTTGGCTTCACG          |
| <i>OsCATB</i>      | <i>Os06g0727200</i> | TCCTACTGGTCCGAGTGTGATG         | TTTCAGGTTGAGACGTGAAGCC          |
| <i>OsZIP52</i>     | <i>Os06g0662200</i> | CTGTTAGAAGCAGAGAGGAGTC         | TTCAGATAACTGTGCCTGCTTT          |
| <i>OsMYB4</i>      | <i>Os04g0517100</i> | GTGAAGCAAAGCTAAAATGGGT         | GGGGGATCAGATCAGATAAGTC          |
| <i>OsMYB30</i>     | <i>Os02g0624300</i> | CTTCTGGCTCAAGCTGTTTCATC        | AATGAACAAGAGATCGACCCAA          |
| <i>OsNAC5</i>      | <i>Os11g0184900</i> | AGGTGGACCTCTACAAGTTCAA         | CGAGAAGAAGTACCACTCCTTC          |
| <i>OsWRKY76</i>    | <i>Os09g0417600</i> | TTGATTACTCGAGCTCCAGAG          | CATTGGTCATCGACTTGAATC           |
| <i>OsWRKY94</i>    | <i>Os12g0597700</i> | AGGAGGAAGTTGCGAATTAAGA         | CGCTGCTACATTTGTAGTAACC          |
